# Supplementary material for: Stress, Coping, and Context: Examining Substance Use Among LGBTQ Young Adults With Probable Substance Use Disorders
Source: Atypon-hosted journal article supplement (doi:10.1176/appi.ps.201900029), 2019-10-23
Supplement: appi.ps.201900029.ds001.pdf [file appi.ps.201900029.ds001.pdf]

## Further Reading

The following are publicly available resources that offer additional guidance on culturally humble practices for providers working with lesbian, gay, bisexual, transgender, and queer (LGBTQ) clients.

1. **Collecting Sexual Orientation and Gender Identity Data in Electronic Health Records**  
Provided by the National LGBT Health Education Center, 2016  
<http://www.lgbthealtheducation.org/wp-content/uploads/Collecting-Sexual-Orientation-and-Gender-Identity-Data-in-EHRs-2016.pdf>
2. **Guidelines for Psychological Practice with Lesbian, Gay, and Bisexual Clients**  
Provided by the American Psychological Association, 2012  
<https://www.apa.org/pi/lgbt/resources/guidelines.aspx>
3. **Providing Welcoming Services and Care for LGBT People**  
Provided by the National LGBT Health Education Center, 2015  
[www.lgbthealtheducation.org/wp-content/uploads/Learning-Guide.pdf](http://www.lgbthealtheducation.org/wp-content/uploads/Learning-Guide.pdf)
4. **Ready, Set, Go! Guidelines and Tips for Collecting Patient Data on Sexual Orientation and Gender Identity**  
Provided by the National LGBT Health Education Center (2018):  
[www.lgbthealtheducation.org/wp-content/uploads/2018/03/Ready-Set-Go-publication-Updated-April-2018.pdf](http://www.lgbthealtheducation.org/wp-content/uploads/2018/03/Ready-Set-Go-publication-Updated-April-2018.pdf)
5. **Ten Things: Creating Inclusive Healthcare Environments for LGBT People**  
Provided by the National LGBT Health Education Center, 2015  
[www.lgbthealtheducation.org/wp-content/uploads/Ten-Things-Brief-Final-WEB.pdf](http://www.lgbthealtheducation.org/wp-content/uploads/Ten-Things-Brief-Final-WEB.pdf)
6. **A Provider's Introduction to Substance Abuse Treatment for Lesbian, Gay, Bisexual, and Transgender Individuals**  
Provided by the Substance Abuse and Mental Health Services Administration (2012):  
[www.store.samhsa.gov/system/files/sma12-4104.pdf](http://www.store.samhsa.gov/system/files/sma12-4104.pdf)
